# Supplementary material
Source: PubMed Central journal article supplement (PMC7613934)
Supplement: EMS154965-supplement-Supplementary_Tables.pdf [file EMS154965-supplement-Supplementary_Tables.pdf]

## Supplementary Tables

**Supplementary Table 1: antibodies used for flow cytometry and immunofluorescence**

| <b>Antibody</b> | <b>Fluorochrome</b> | <b>Company</b> | <b>Reference</b> |
|-----------------|---------------------|----------------|------------------|
| <b>CD3</b>      | FITC                | BD             | 555274           |
| <b>CD3</b>      | PE                  | BD             | 555275           |
| <b>CD3</b>      | PercpCy5            | Invitrogen     | 4341614          |
| <b>CD3</b>      | PB                  | Biolegend      | 100214           |
| <b>CD4</b>      | FITC                | BD             | 553650           |
| <b>CD4</b>      | APC-H7              | BD             | 560181           |
| <b>CD4</b>      | PercpCy5            | BD             | 553052           |
| <b>CD5</b>      | FITC                | BioLegend      | 100605           |
| <b>CD5</b>      | APC                 | BioLegend      | 100626           |
| <b>CD8a</b>     | PE                  | BD             | 553032           |
| <b>CD8a</b>     | PE-Cy7              | eBioscience    | 25-0081-81       |
| <b>CD11b</b>    | PerCP               | BioLegend      | 101230           |
| <b>CD11b</b>    | PB                  | BioLegend      | 101223           |
| <b>CD11b</b>    | AF700               | BioLegend      | 101222           |
| <b>CD11b</b>    | PEDazzle            | BioLegend      | 101256           |
| <b>CD16/32</b>  | APC-Cy7             | BioLegend      | 101327           |
| <b>CD19</b>     | PE                  | eBioscience    | 12-0193-82       |
| <b>CD19</b>     | FITC                | Biolegend      | 152404           |
| <b>CD19</b>     | PE-Dazzle594        | Biolegend      | 115554           |
| <b>CD23</b>     | PE                  | BioLegend      | 101608           |
| <b>CD23</b>     | AF700               | Biolegend      | 101631           |
| <b>CD24</b>     | APC                 | BioLegend      | 101814           |

|                                         |               |             |               |
|-----------------------------------------|---------------|-------------|---------------|
| <b>CD25</b>                             | BV510         | BioLegend   | 101831        |
| <b>CD38</b>                             | PE Cy7        | BioLegend   | 102717        |
| <b>CD38</b>                             | PercpCy5      | BioLegend   | 102721        |
| <b>CD43</b>                             | PE            | BioLegend   | 143205        |
| <b>CD45.1</b>                           | FITC          | eBioscience | 11-0453-82    |
| <b>CD45.2</b>                           | APC           | BD          | 561875/558702 |
| <b>CD45.2</b>                           | BV510         | Biolegend   | 109837        |
| <b>CD45.2</b>                           | BV711         | Biolegend   | 109847        |
| <b>CD45R/B220</b>                       | PE            | BD          | 553089        |
| <b>CD45R/B220</b>                       | PB            | Biolgend    | 103230        |
| <b>CD45R/B220</b>                       | BUV395        | BD Horizon  | 563793        |
| <b>CD45R/B220</b>                       | BV510         | Biolegend   | 103247        |
| <b>CD115</b>                            | PE            | Biolegend   | 135505        |
| <b>CD115</b>                            | APC           | eBioscience | 17-1152-82    |
| <b>CD127 (IL-7R<math>\alpha</math>)</b> | PE-Dazzle594  | Biolegend   | 135032        |
| <b>CD127 (IL-7R<math>\alpha</math>)</b> | BV510         | Biolegend   | 135033        |
| <b>CD138</b>                            | AlexaFluor647 | BioLegend   | 142525        |
| <b>CD138</b>                            | PE-Dazzle594  | BioLegend   | 142527        |
| <b>CXCR5 (CD185)</b>                    | PE            | Biolegend   | 145513        |
| <b>CCR6 (CD196)</b>                     | PercpCy5      | BioLegend   | 129809        |
| <b>F4/80</b>                            | PE            | BioLegend   | 123110        |
| <b>IgM</b>                              | PE/Cy7        | BioLegend   | 406514        |
| <b>IgM</b>                              | AlexaFlour647 | BioLegend   | 406525        |
| <b>IgD</b>                              | BV605         | BioLegend   | 405727        |
| <b>Ly6C</b>                             | FITC          | BD          | 553104        |

|               |         |             |         |
|---------------|---------|-------------|---------|
| <b>Ly6C</b>   | PE-Cy7  | BD          | 560593  |
| <b>Ly6C</b>   | BV421   | Biolegend   | 128031  |
| <b>Ly6G</b>   | FITC    | Biolegend   | 127605  |
| <b>Ly6G</b>   | APC/Cy7 | Biolegend   | 127623  |
| <b>Ly6G</b>   | BUV395  | BD Horizont | 563978  |
| <b>PNA</b>    | FITC    | Vector      | FL-1071 |
| <b>yd TCR</b> | APC     | Biolegend   | 17-5711 |

Supplementary Table 2: TaqMan Gene Expression Assays used for real time PCR

| Gene                                 | Reference     |
|--------------------------------------|---------------|
| <b><i>Bach2</i></b>                  | Mm00464379_m1 |
| <b><i>Bcl6</i></b>                   | Mm00477633_m1 |
| <b><i>Cd36</i></b>                   | Mm01135198_m1 |
| <b><i>Ddhd1</i></b>                  | Mm00616337_m1 |
| <b><i>Fcer2</i></b>                  | Mm00442792_m1 |
| <b><i>Gapdh</i></b>                  | Mm99999915_g1 |
| <b><i>Gpr55</i></b>                  | Mm02621622_s1 |
| <b><i>Ifny</i></b>                   | Mm01168134_m1 |
| <b><i>Inos</i></b>                   | Mm00440502_m1 |
| <b><i>Il1<math>\beta</math></i></b>  | Mm00434228_m1 |
| <b><i>Il6</i></b>                    | Mm00446190_m1 |
| <b><i>Il10</i></b>                   | Mm01288386_m1 |
| <b><i>Irf4</i></b>                   | Mm00516431_m1 |
| <b><i>Hprt</i></b>                   | Mm03024075_m1 |
| <b><i>Pax5</i></b>                   | Mm0043550_m1  |
| <b><i>Pdia4</i></b>                  | Mm00437958_m1 |
| <b><i>Prdm1</i></b>                  | Mm00476128_m1 |
| <b><i>Ptcarp</i></b>                 | Mm01236556_m1 |
| <b><i>Srb1</i></b>                   | Mm00450234_m1 |
| <b><i>Tgf<math>\beta</math>1</i></b> | Mm01178820_m1 |
| <b><i>Tnfa</i></b>                   | Mm00443258_m1 |
| <b><i>Xbp1</i></b>                   | Mm00457357_m1 |
| <b><i>Zbtb20</i></b>                 | Mm00457764_m1 |

Supplementary Table 3: Digital droplet PCR primers and probes (Integrated Data Technologies)

| Gene                | Forward                   | Reverse                        | Probe                                          |
|---------------------|---------------------------|--------------------------------|------------------------------------------------|
| <b><i>Hprt</i></b>  | 5'GACCGGTCCCGT CATGC3'    | 5'TCATAACCTGGT<br>TCATCATCGC3' | 5'HEX-ACCCG*CAGT/ZEN/<br>CCCAGCGTCGTG-3'IABkFQ |
| <b><i>Gpr55</i></b> | 5'GTCCATATCCC CACCTTCCT3' | 5'CATCTTGAATGG GAGGGAGA3'      | 5'6-FAM-TCTCAACCT/ZEN/<br>ACTGGCCATCC-3'IABkFQ |
